# Supplementary material for: Antimetabolite pemetrexed primes a favorable tumor microenvironment for immune checkpoint blockade therapy
Source: PubMed Central journal article supplement (PMC7692992; doi:10.1136/jitc-2020-001392), 2020-11-26
Supplement: jitc-2020-001392supp001.pdf [file jitc-2020-001392supp001.pdf]

**Suppl. Table S1. IC<sub>50</sub> values of various chemotherapeutic agents in cancer cell lines.**

|                                 | CL1-5 | CL1-5 | CL1-5 | CL1-5 | CL1-5 | CL141 | H1299 | CT26  | LL2   |
|---------------------------------|-------|-------|-------|-------|-------|-------|-------|-------|-------|
|                                 |       | _R1   | _R2   | _NR1  | _NR2  |       |       |       |       |
| <b>Pemetrexed (PEM) (nM)</b>    | 280.7 | 139.6 | 182   | 359.1 | 378.3 | 636.5 | 1070  | >5uM  | 173.9 |
| <b>Fluorouracil (5-FU) (μM)</b> | 1.2   | 1.89  | 1.43  | 1.03  | 4.378 | 8.1   | 12.2  | 25.46 | 7.5   |
| <b>Paclitaxel (PTX) (nM)</b>    | 3.2   | 9.86  | 19.47 | 23.14 | 6.01  | 3.5   | 17.3  | 51.69 | 56.29 |
| <b>Cisplatin (μM)</b>           | 18.4  | 8.7   | 11    | 8.15  | 7.06  | 12.8  | 21.9  | 7.86  | 3.16  |

Indicated cancer cell lines ( $5 \times 10^3$  cells/well) were seeded in 96-well plates overnight and the culture medium was replaced with fresh medium containing drugs at concentrations of 0.001–10 μM. After 72 hours, cell viability was assessed with the SRB assay to determine IC<sub>50</sub> values. Values shown are the mean ± SD from three independent experiments.
